# Supplementary material for: Vat photopolymerization using catalytic chain transfer polymerization (CCTP) derived reactive oligomers to influence mechanical properties
Source: Royal Society of Chemistry journal article supplement (doi:10.1039/d4py00482e), 2024-01-01
Supplement: d4py00482e1.pdf [file d4py00482e1.pdf]

## **Electronic Supplementary Information**

### **Vat photopolymerization using catalytic chain transfer polymerization (CCTP) derived reactive oligomer to improve the mechanical properties** Wai

Hin Lee<sup>a</sup>, Zhongyuan Wan<sup>b</sup>, Ataula Shegiwal<sup>a</sup>, David Haddleton<sup>a, b\*</sup>

<sup>a</sup>: Halcyon3D Ltd., 27f Ignite House, Venture Centre, Coventry, CV4 7EZ,

<sup>b</sup>: Department of Chemistry, University of Warwick, Coventry, CV4 7AL

Email: [a.shegiwal@halcyon3d.co.uk](mailto:a.shegiwal@halcyon3d.co.uk), [D.M.Haddleton@warwick.ac.uk](mailto:D.M.Haddleton@warwick.ac.uk)

## Figures

|                                                                                                                                                                                                                                                                                                           |   |
|-----------------------------------------------------------------------------------------------------------------------------------------------------------------------------------------------------------------------------------------------------------------------------------------------------------|---|
| Figure S.1 Determination of knee point by 15 <sup>th</sup> order polynomial fit, then finding the minimum 1 <sup>st</sup> derivative and its integration to the knee point from stress-strain curves by tensile test. ....                                                                                | 2 |
| Figure S. 2 Mechanism of CCTP to synthesize $\omega$ -vinyl terminated oligomers and AFCT mediated by the derived $\omega$ -vinyl terminated oligomers.....                                                                                                                                               | 3 |
| Figure S 3 <sup>1</sup> H NMR (CDCl <sub>3</sub> , 400 MHz) spectra of EHMA monomer (red, bottom), EHMA <sub>5</sub> (green, middle) and EHMA <sub>15</sub> (blue, top) reactive oligomer synthesized via CCTP and subsequent AFCT.....                                                                   | 4 |
| Figure S 4 <sup>1</sup> H NMR spectra (CDCl <sub>3</sub> , 400 MHz) of PEGMA monomer (red, bottom), PEGMA <sub>14</sub> (green, middle) and PEGMA <sub>28</sub> (blue, top) reactive oligomer synthesized via CCTP and subsequent AFCT.....                                                               | 4 |
| Figure S 5 Molecular weight distribution (left): EHMA <sub>5</sub> reactive oligomer via CCTP (blue), and EHMA <sub>10</sub> (orange) EHMA <sub>15</sub> (green) reactive oligomer via subsequent AFCT; and (right): PEGMA <sub>14</sub> (blue) and PEGMA <sub>28</sub> (orange) via subsequent AFCT..... | 5 |
| Figure S.6 .stl model of dogbone specimen for mechanical testing. All values are in mm with the thickness of 3 mm from the top, and typical photo of as-printed parts.....                                                                                                                                | 6 |
| Figure S7 FTIR spectra of 3D printed parts and the original resin. The disappearance of the band at 816 and 1636 cm <sup>-1</sup> of the acrylic =CH <sub>2</sub> and C=C suggests the high conversion of the printed parts.....                                                                          | 7 |

## Tables

|                                                                                                                                                                                                                      |    |
|----------------------------------------------------------------------------------------------------------------------------------------------------------------------------------------------------------------------|----|
| Table S. 1 IR bands and their assignment of the 3D printed parts.....                                                                                                                                                | 8  |
| Table S. 2 Stress ( $\sigma$ ), strain ( $\epsilon$ ) and specific energy ( $U_T$ ) at knee point ( $k$ ) and the ultimate point ( $u$ ) of printed parts measured by tensile testing at 50 mm s <sup>-1</sup> ..... | 9  |
| Table S. 3 Temperature at maximum $\tan \delta$ ( $T_{\max \tan \delta}$ ) and the peak width at 25% ( $\delta T_{25\%}$ ), 50% ( $\delta T_{50\%}$ ), and 75% ( $\delta T_{75\%}$ ) height.....                     | 10 |

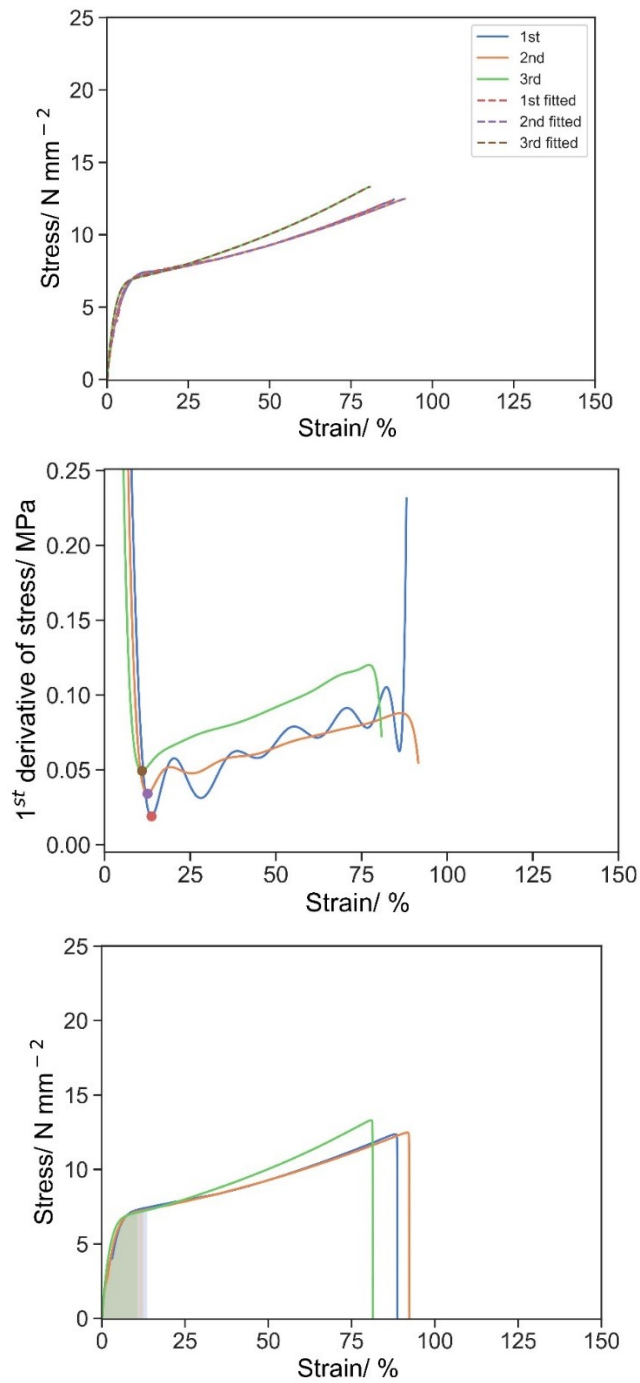

Figure S.1 Determination of knee point by 15<sup>th</sup> order polynomial fit, then finding the minimum 1<sup>st</sup> derivative and its integration to the knee point from stress-strain curves by tensile test.

An example of 15<sup>th</sup> order polynomial fitting of stress strain curve and the determination of knee point at the minimum first derivative of the fitted curve; and the derived specific deformation energy by the integration to the knee point (shaded area).

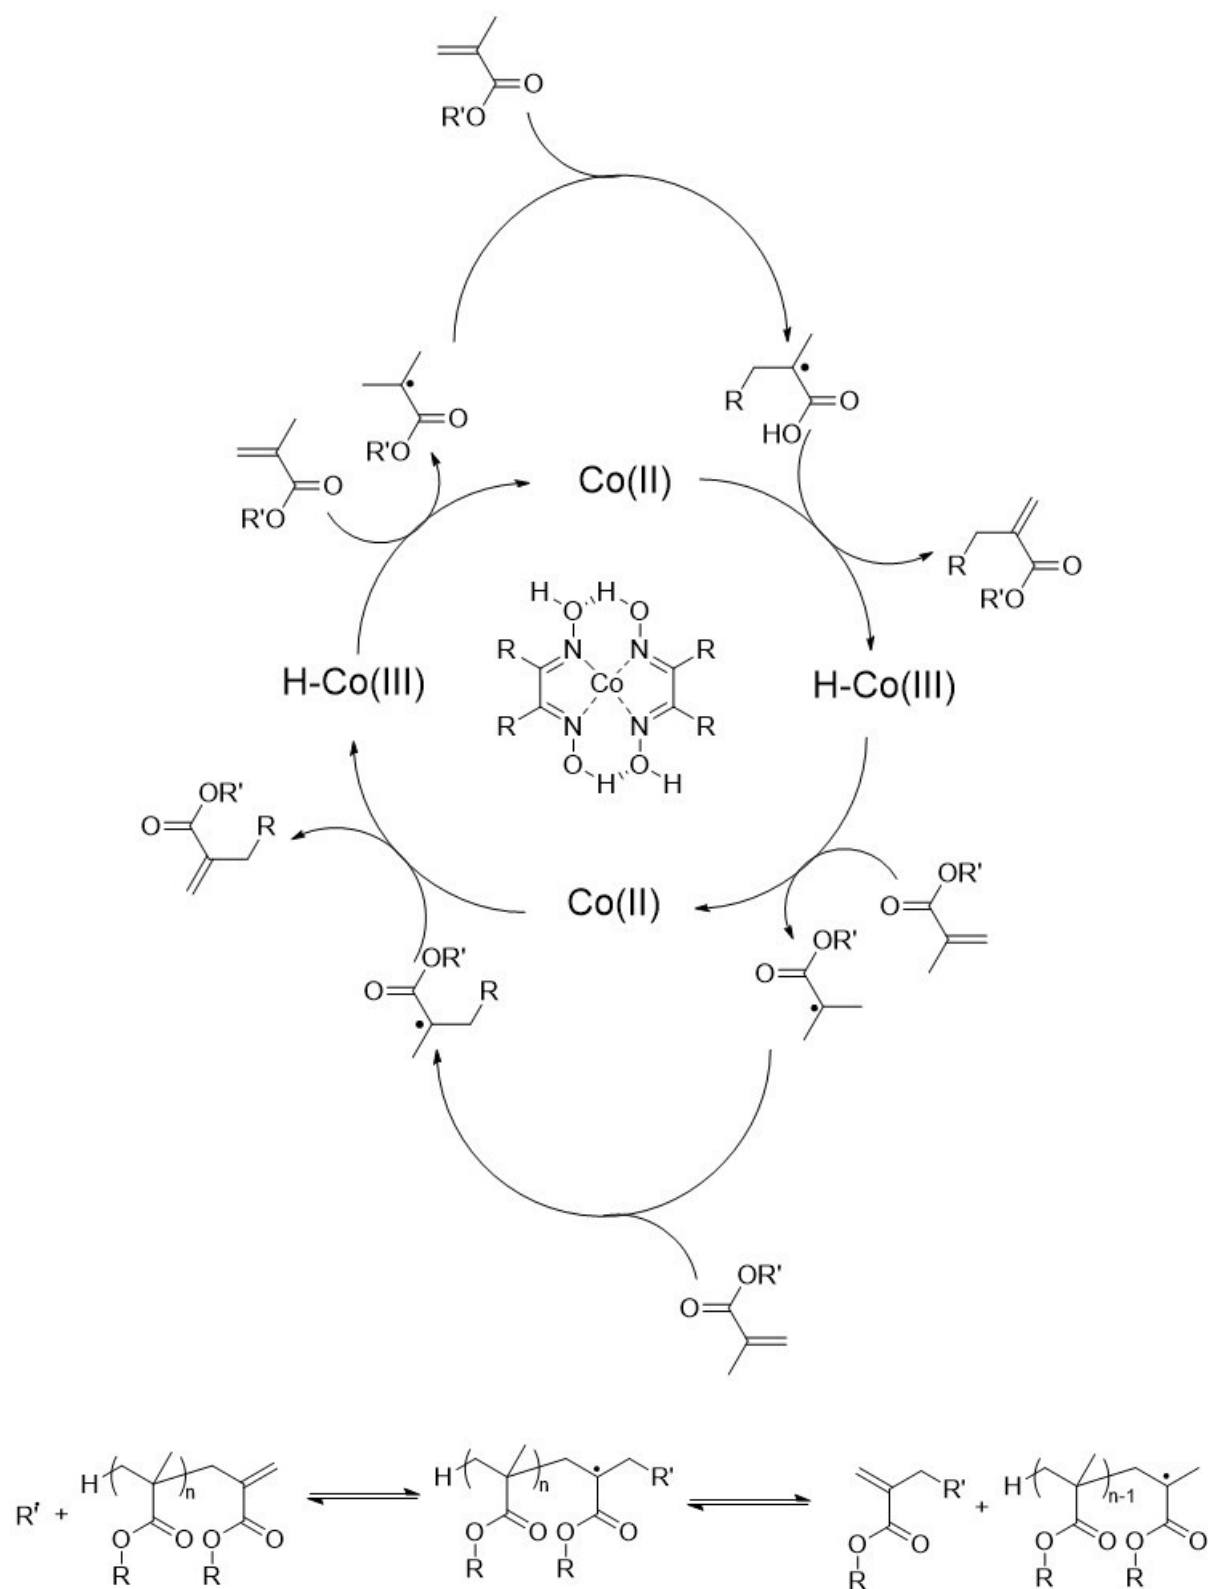

Figure S. 2 Mechanism of CCTP to synthesize ω-vinyl terminated oligomers and AFCT mediated by the derived ω-vinyl terminated oligomers

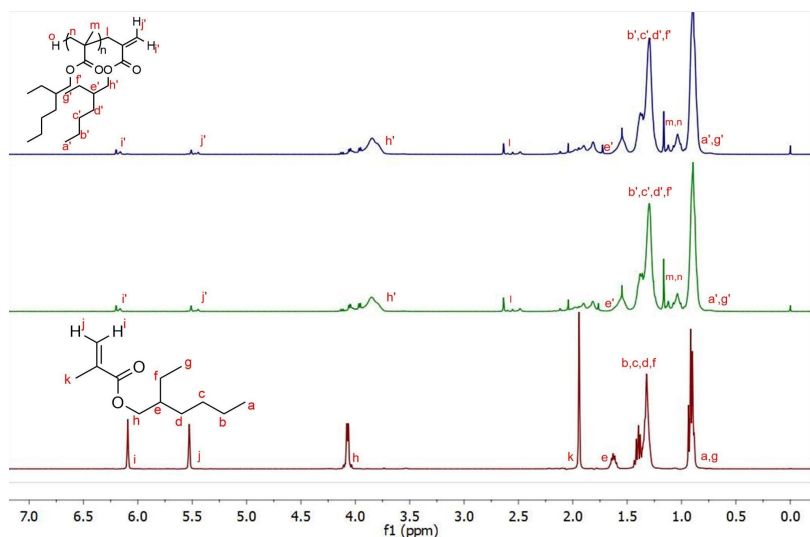

Figure S 3  $^1\text{H}$  NMR (CDCl<sub>3</sub>, 400 MHz) spectra of EHMA monomer (red, bottom), EHMA<sub>5</sub> (green, middle) and EHMA<sub>15</sub> (blue, top) reactive oligomer synthesized via CCTP and subsequent AFCT

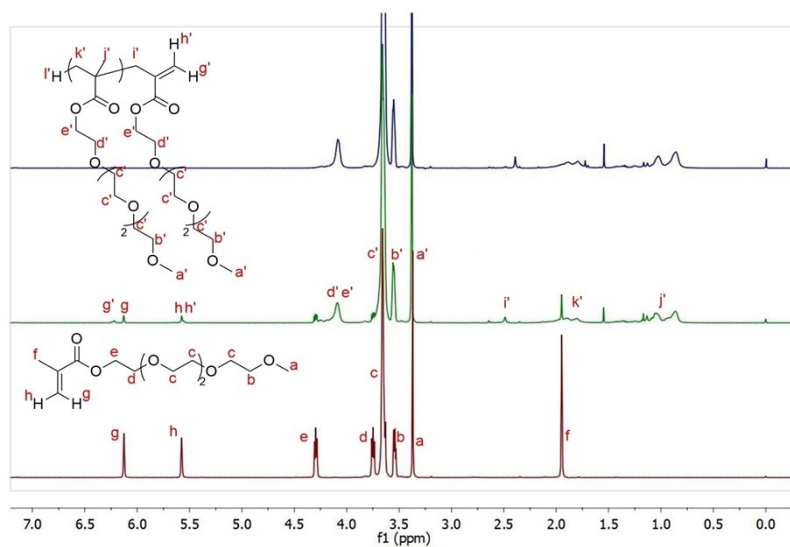

Figure S 4  $^1\text{H}$  NMR spectra (CDCl<sub>3</sub>, 400 MHz) of PEGMA monomer (red, bottom), PEGMA<sub>14</sub> (green, middle) and PEGMA<sub>28</sub> (blue, top) reactive oligomer synthesized via CCTP and subsequent AFCT

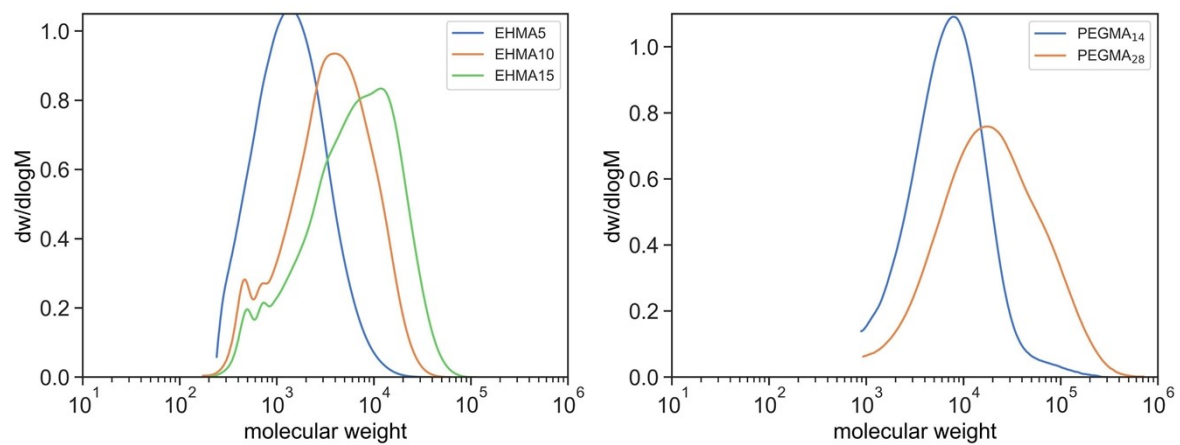

Figure S 5 Molecular weight distribution (left): EHMA<sub>5</sub> reactive oligomer via CCTP (blue), and EHMA<sub>10</sub> (orange) EHMA<sub>15</sub> (green) reactive oligomer via subsequent AFCT; and (right): PEGMA<sub>14</sub> (blue) and PEGMA<sub>28</sub> (orange) via subsequent AFCT.

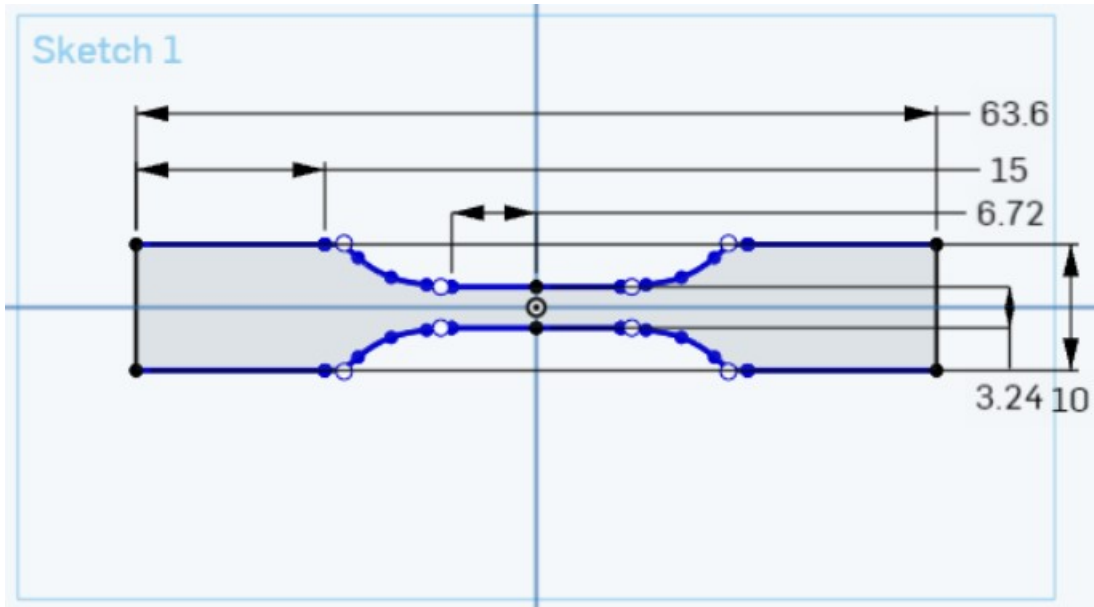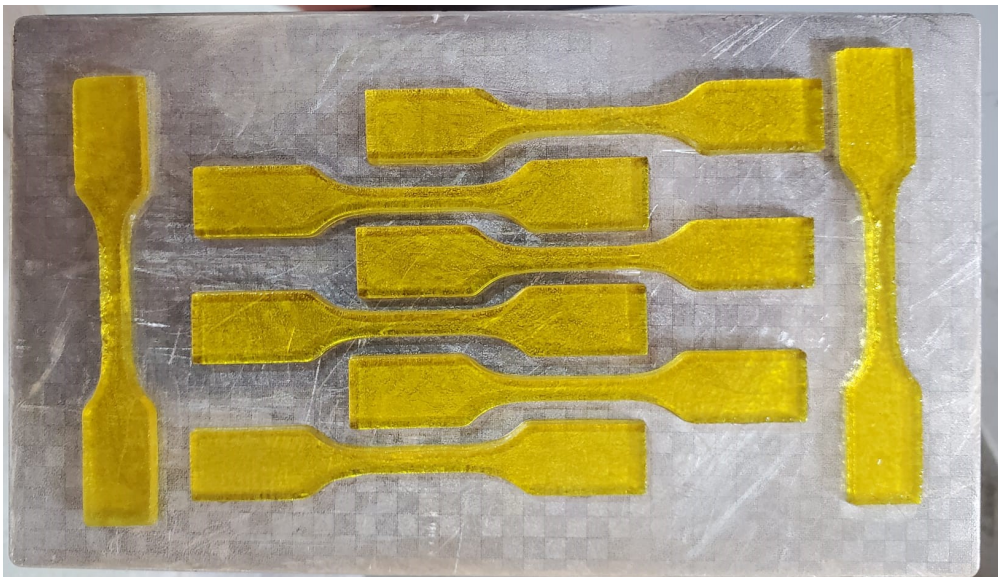

Figure S.6 .stl model of dogbone specimen for mechanical testing. All values are in mm with the thickness of 3 mm from the top, and typical photo of as-printed parts



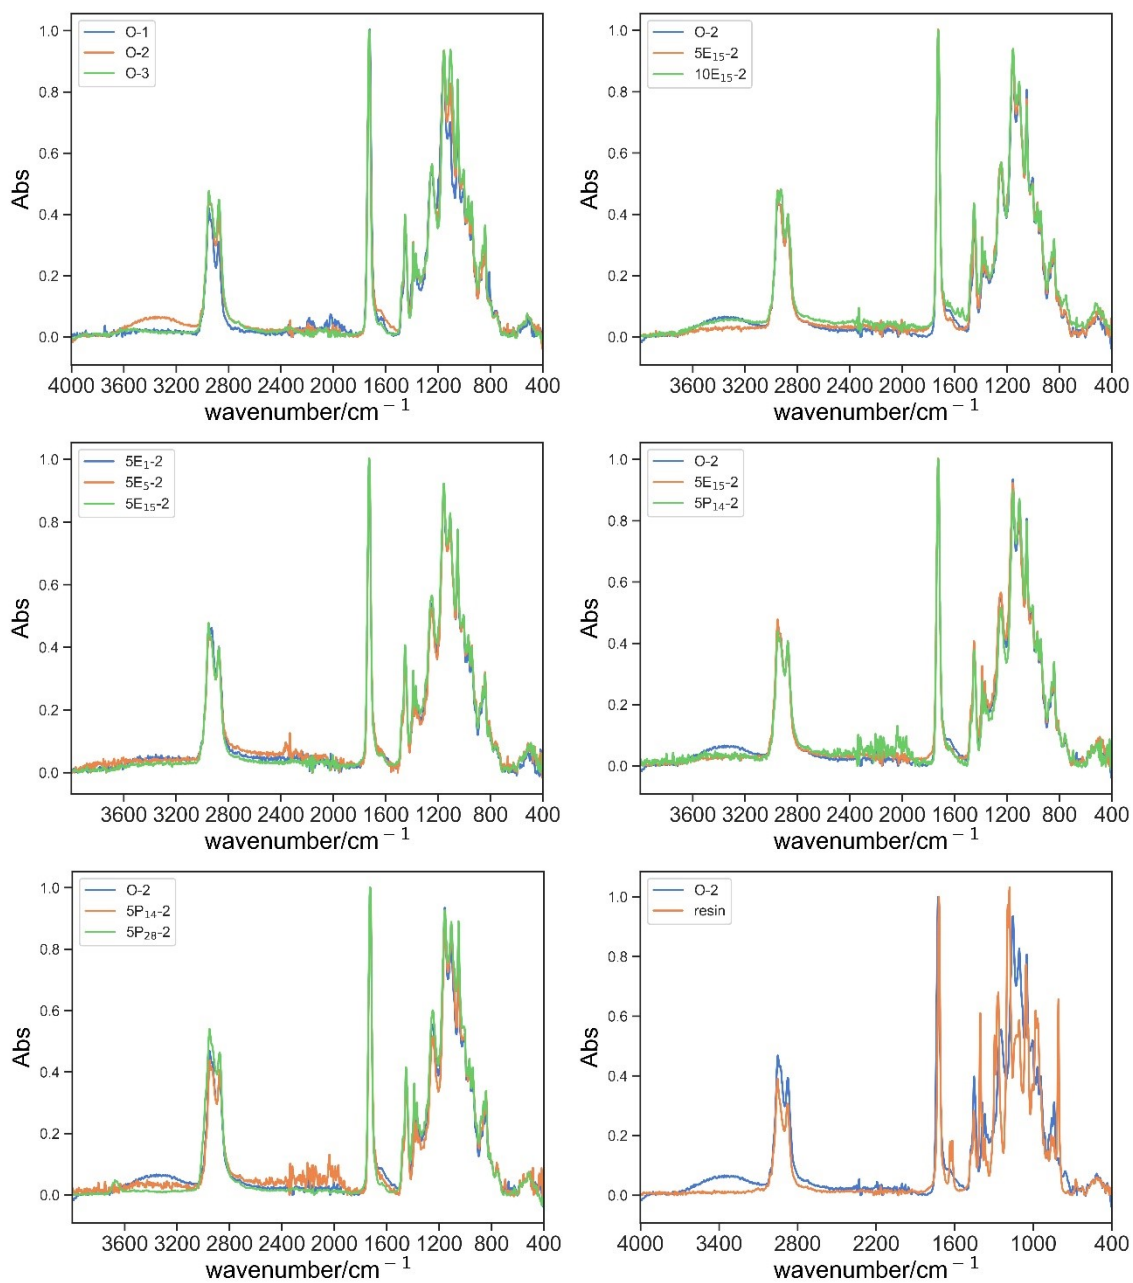

Figure S7 FTIR spectra of 3D printed parts and the original resin. The disappearance of the band at 816 and 1636  $\text{cm}^{-1}$  of the acrylic  $=\text{CH}_2$  and  $\text{C}=\text{C}$  suggests the high conversion of the printed parts.

Table S. 1 IR bands and their assignment of the 3D printed parts

| Wavenumber/ $\text{cm}^{-1}$ | Assignments                        | Ref. |
|------------------------------|------------------------------------|------|
| 2951                         | Asym C-H stretch ( $\text{CH}_3$ ) | 1    |
| 2876                         | Sym C-H stretch ( $\text{CH}_3$ )  | 2    |
| 1724                         | C=O stretching                     | 2    |
| 1452                         | C-H def.                           | 1    |
| 1391                         | C-( $\text{CH}_3$ ) sym def.       | 3    |
| 1371                         | C-( $\text{CH}_3$ ) sym def.       | 2    |
| 1248                         | -C-C-O stretching                  | 4    |
| 1159                         | C-O-C stretching                   | 3    |
| 1110                         | Sym C-O-C stretch                  | 4    |
| 1051                         | Sym C-O-C stretch                  | 3    |
| 969                          | $\text{CH}_2$ -O (ether)           | 2    |
| 942                          | $\text{CH}_2$ -O (ether)           | 2    |
| 816                          | =C-H out-of-plan                   | 4    |

Table S. 2 Stress ( $\sigma$ ), strain ( $\epsilon$ ) and specific energy ( $U_T$ ) at knee point ( $K$ ) and the ultimate point ( $U$ ) of printed parts measured by tensile testing at 50 mm s<sup>-1</sup>

| Sample                | $\sigma_K$ / MPa | $\epsilon_K$ / % | $U_{T,K}$ / MPa   | $\sigma_U$ / MPa | $\epsilon_U$ / % | $U_{T,U}$ / MPa   |
|-----------------------|------------------|------------------|-------------------|------------------|------------------|-------------------|
| O-1                   | 45.71<br>(1.48)  | 17.03<br>(1.04)  | 443.51<br>(34.91) | 44.39<br>(1.39)  | 18.14<br>(1.72)  | 502.30<br>(66.97) |
| O-2                   | 26.78<br>(0.54)  | 8.10<br>(0.57)   | 136.62<br>(14.59) | 18.87<br>(1.02)  | 21.13<br>(1.31)  | 415.97<br>(15.42) |
| O-3                   | 7.28<br>(0.13)   | 12.34<br>(1.13)  | 70.96<br>(5.58)   | 12.64<br>(0.43)  | 87.68<br>(4.59)  | 796.94<br>(32.40) |
| 10-E <sub>15</sub> -1 | 20.58<br>(0.66)  | 6.53<br>(0.43)   | 77.92<br>(6.28)   | 20.16<br>(0.47)  | 6.57<br>(0.43)   | 80.55<br>(6.40)   |
| 10-E <sub>15</sub> -2 | 13.44<br>(0.66)  | 8.17<br>(0.45)   | 73.77<br>(6.52)   | 12.82<br>(0.61)  | 8.86<br>(0.87)   | 83.67<br>(9.23)   |
| 10-E <sub>15</sub> -3 | 6.38<br>(0.42)   | 22.78<br>(0.36)  | 114.03<br>(7.76)  | 11.07<br>(0.78)  | 84.16<br>(5.91)  | 644.54<br>(85.60) |
| 5-E <sub>1</sub> -2   | 23.88<br>(0.90)  | 8.44<br>(0.29)   | 126.81<br>(3.69)  | 19.01<br>(0.64)  | 34.21<br>(1.78)  | 635.06<br>(35.42) |
| 5-E <sub>5</sub> -2   | 21.93<br>(0.97)  | 8.12<br>(1.52)   | 112.04<br>(13.79) | 17.85<br>(0.77)  | 17.92<br>(5.03)  | 302.25<br>(74.75) |
| 5-E <sub>15</sub> -2  | 19.31<br>(1.07)  | 8.13<br>(1.06)   | 101.90<br>(17.63) | 15.76<br>(0.41)  | 25.77<br>(3.98)  | 400.31<br>(51.48) |
| 5-P <sub>14</sub> -2  | 17.61<br>(1.11)  | 8.06<br>(1.46)   | 95.10<br>(21.48)  | 16.47<br>(0.77)  | 39.61<br>(4.41)  | 609.65<br>(52.25) |
| 10-P <sub>1</sub> -2  | 7.65<br>(0.18)   | 21.17<br>(1.88)  | 102.26<br>(8.90)  | 11.23<br>(1.29)  | 71.69<br>(1.68)  | 615.18<br>(9.98)  |
| 10-P <sub>14</sub> -2 | 13.76<br>(0.37)  | 9.93<br>(1.44)   | 95.61<br>(12.66)  | 14.06<br>(0.96)  | 38.79<br>(1.46)  | 495.59<br>(11.54) |
| 10-P <sub>28</sub> -2 | 17.10<br>(0.40)  | 9.35<br>(0.88)   | 109.27<br>(10.74) | 15.08<br>(0.34)  | 30.37<br>(2.66)  | 442.10<br>(35.03) |

Table S. 3 Temperature at maximum  $\tan \delta$  ( $T_{\max \tan \delta}$ ) and the peak width at 25% ( $\delta T_{25\%}$ ), 50% ( $\delta T_{50\%}$ ), and 75% ( $\delta T_{75\%}$ ) height

| Sample               | $T_{\max \tan \delta}$ | $\delta T_{25\%}$ | $\delta T_{50\%}$ | $\delta T_{75\%}$ |
|----------------------|------------------------|-------------------|-------------------|-------------------|
| O-1                  | 74.1                   | 17.2              | 11.4              | 7.2               |
| O-2                  | 61.8                   | 18.3              | 11.8              | 7.0               |
| O-3                  | 44.0                   | 23.9              | 14.6              | 8.6               |
| 10E <sub>15</sub> -1 | 70.1                   | 15.6              | 9.2               | 5.1               |
| 10E <sub>15</sub> -2 | 55.1                   | 33.4              | 19.5              | 9.3               |
| 10E <sub>15</sub> -3 | 35.7                   | 25.8              | 16.0              | 9.7               |
| 5E <sub>1</sub> -2   | 53.8                   | 19.3              | 10.4              | 5.0               |
| 5E <sub>5</sub> -2   | 54.6                   | 20.2              | 9.7               | 4.8               |
| 5E <sub>15</sub> -2  | 57.8                   | 22.7              | 12.1              | 6.7               |
| 5P <sub>14</sub> -2  | 60.1                   | 25.0              | 15.2              | 9.4               |
| 10P <sub>1</sub> -2  | 53.6                   | 17.7              | 11.0              | 6.8               |
| 10P <sub>14</sub> -2 | 54.1                   | 21.7              | 13.2              | 5.9               |
| 10P <sub>28</sub> -2 | 60.6                   | 16.6              | 9.4               | 5.1               |

## References:

- 1 M. Dounya, U. Maschke, N. Bouchikhi, H. Ziani Chérif and L. Bedjaoui-Alachaher, *Polym. Bull.*, 2023, **80**, 10073–10098.
- 2 J. Wu, C. Wang, Y. Xiao, C. Mu and W. Lin, *Progress in Organic Coatings*, 2020, **147**, 105812.
- 3 Q. Tang, X. Sun, Q. Li, J. Lin and J. Wu, *J Mater Sci*, 2009, **44**, 3712–3718.
- 4 M. Ye, D. Zhang, L. Han, J. Tejada and C. Ortiz, *Soft Matter*, 2006, **2**, 243–256.
